# Supplementary material for: The importin α/β-specific inhibitor Ivermectin affects HIF-dependent hypoxia response pathways
Source: publisher site journal article supplement (doi:10.1515/hsz-2015-0171), 2015-07-31
Supplement: Supplementary file 1 [file 15-171_Supplementary_Figure_1_legend.doc]

**Supplementary Figure 1** HIF-1α protein expression in whole-cell extracts.

Defined numbers of U2OS and Kelly cells were pre-treated for 1 h with Ivermectin at concentrations in the range of 1-10 µM (7.5 µM) or DMSO and then exposed to normoxia (20% O2) or hypoxia (3% O2) for 24 h. Whole-cell extracts of U2OS and Kelly cells were analysed for HIF-1α protein expression levels with a monoclonal anti-HIF-1α antibody by western blotting. The anti-Lamin A/C, respectively anti-Actin antibody served as control for equal protein loading and transfer.
